# Supplementary material
Source: MDPI journal article supplement (https://www.mdpi.com/2674-1024/2/4/33)
Supplement: s1 [file s1]

Supplementary table S1. Proximate chemical analysis of seaweed (g 100 g<sup>-1</sup> dry weight)

|               | <b>EA</b> | <b>MP</b> | <b>PC</b> | <b>SH</b> |
|---------------|-----------|-----------|-----------|-----------|
| Carbohydrates | 41.31     | 34.72     | 57.39     | 41.47     |
| Protein       | 11.30     | 7.64      | 8.72      | 7.53      |
| Lipids        | 1.28      | 0.77      | 0.60      | 0.62      |
| Fiber         | 8.86      | 13.13     | 14.46     | 8.47      |
| Ashes         | 24.64     | 33.2      | 12.81     | 33.57     |
| Humidity      | 10.63     | 10.36     | 6.03      | 8.33      |
| Nitrogen      | 2.1       | 1.42      | 1.62      | 1.4       |
